# Supplementary material for: Tuning the morphology of Co3O4 on Ni foam for supercapacitor application
Source: Royal Society of Chemistry journal article supplement (doi:10.1039/c6ra03400d), 2016-01-01
Supplement: c6ra03400d1.pdf [file c6ra03400d1.pdf]

Electronic Supplementary Material (ESI) for RSC Advances

## Tuning the morphology of $\text{Co}_3\text{O}_4$ on Ni foam for supercapacitor application

Zheyin Yu <sup>a</sup>, Zhenxiang Cheng\* <sup>a</sup>, Zhixin Tai <sup>a</sup>, Xiaolin Wang <sup>a</sup>, Chandrasekar Mayandi Subramaniyam <sup>a</sup>,  
Chunsheng Fang <sup>a</sup>, Shaymaa Al-Rubaye <sup>a</sup>, Xiaotian Wang <sup>a</sup>, Shixue Dou <sup>a</sup>

<sup>a</sup> Institute for Superconducting and Electronic Materials, University of Wollongong, North Wollongong, NSW  
2500, Australia. E-mail: [cheng@uow.edu.au](mailto:cheng@uow.edu.au); Fax: +61-2-42215731; Tel: +61-2-42981406

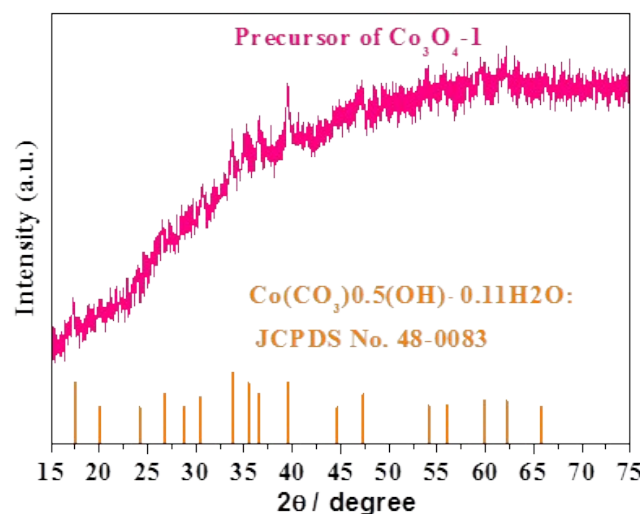

**Figure S1** XRD pattern of the  $\text{Co}_3\text{O}_4$ -1 precursor  
(scratched from Ni foam after 6 h hydrothermal reaction).

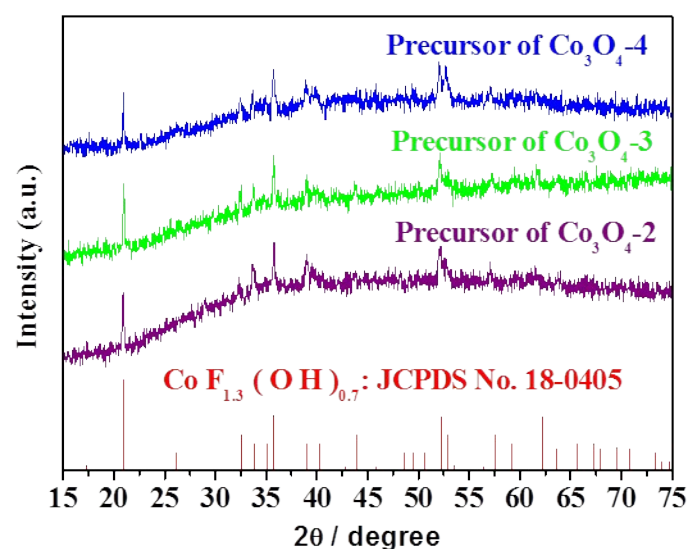

**Figure S2** XRD patterns of the  $\text{Co}_3\text{O}_4$ -2,  $\text{Co}_3\text{O}_4$ -3, and  $\text{Co}_3\text{O}_4$ -4 precursors  
(scratched from Ni foam after 6 h hydrothermal reaction)

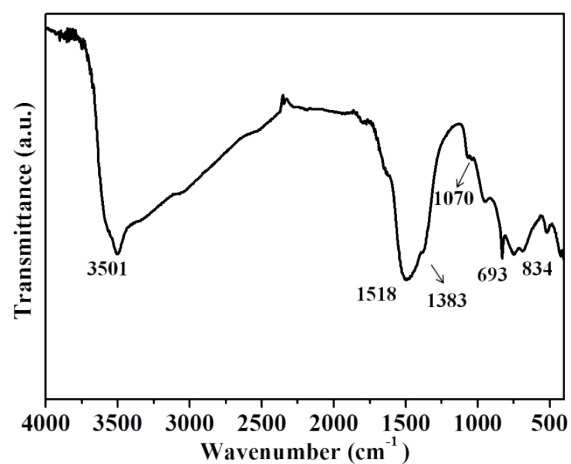

**Figure S3** FTIR spectrum of the Co<sub>3</sub>O<sub>4</sub>-1 precursor (scratched from Ni foam after 6 h hydrothermal reaction).

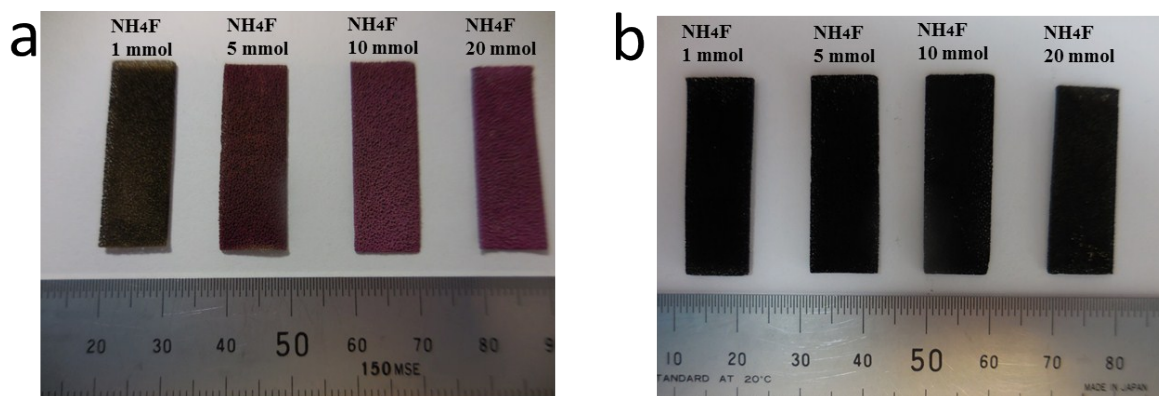

**Figure S4** Optical images of precursors of Co<sub>3</sub>O<sub>4</sub>-1, Co<sub>3</sub>O<sub>4</sub>-2, Co<sub>3</sub>O<sub>4</sub>-3, and Co<sub>3</sub>O<sub>4</sub>-4 (left to right) (a); optical images of Co<sub>3</sub>O<sub>4</sub>-1, Co<sub>3</sub>O<sub>4</sub>-2, Co<sub>3</sub>O<sub>4</sub>-3, and Co<sub>3</sub>O<sub>4</sub>-4 (left to right) (b).

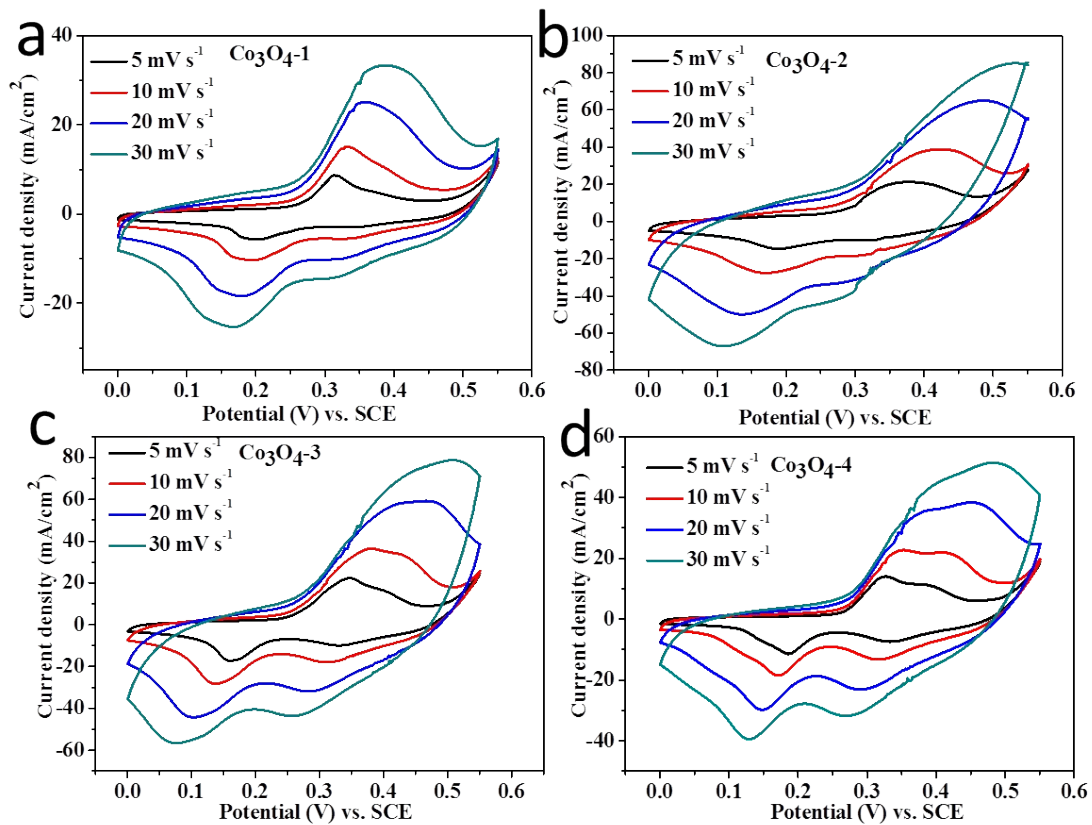

**Figure S5** CV curves of  $\text{Co}_3\text{O}_4$ -1 (a),  $\text{Co}_3\text{O}_4$ -2 (b),  $\text{Co}_3\text{O}_4$ -3 (c), and  $\text{Co}_3\text{O}_4$ -4 (d) at various scan rates.

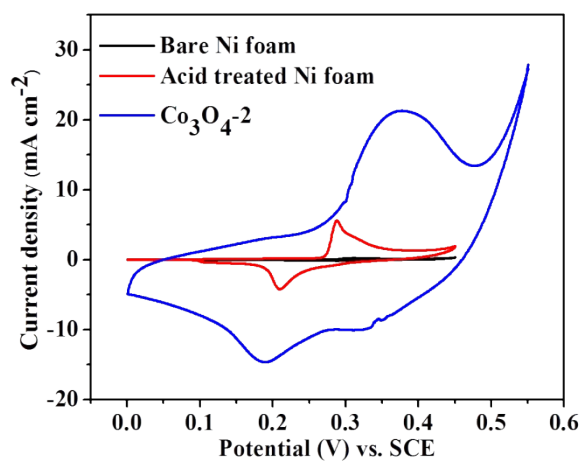

**Figure S6** CV curves of bare Ni foam, 6 M hydrochloric acid treated Ni foam and  $\text{Co}_3\text{O}_4$ -2 at 5  $\text{mV s}^{-1}$  scan rate.

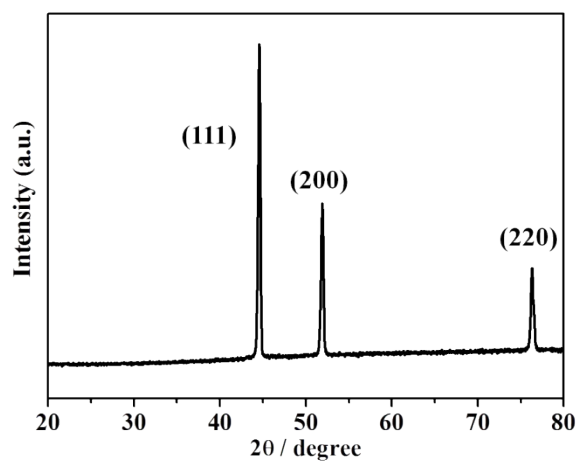

**Figure S7** XRD patterns of 6 M hydrochloric acid treated Ni foam

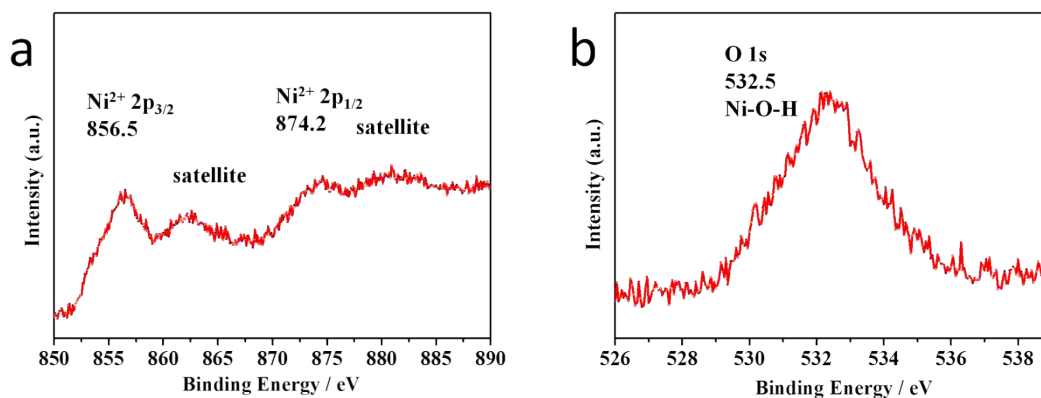

**Figure S8** Ni 2p XPS spectra of 6 M hydrochloric acid treated Ni foam (a), O 1s XPS spectra of 6 M hydrochloric acid treated Ni foam (b).

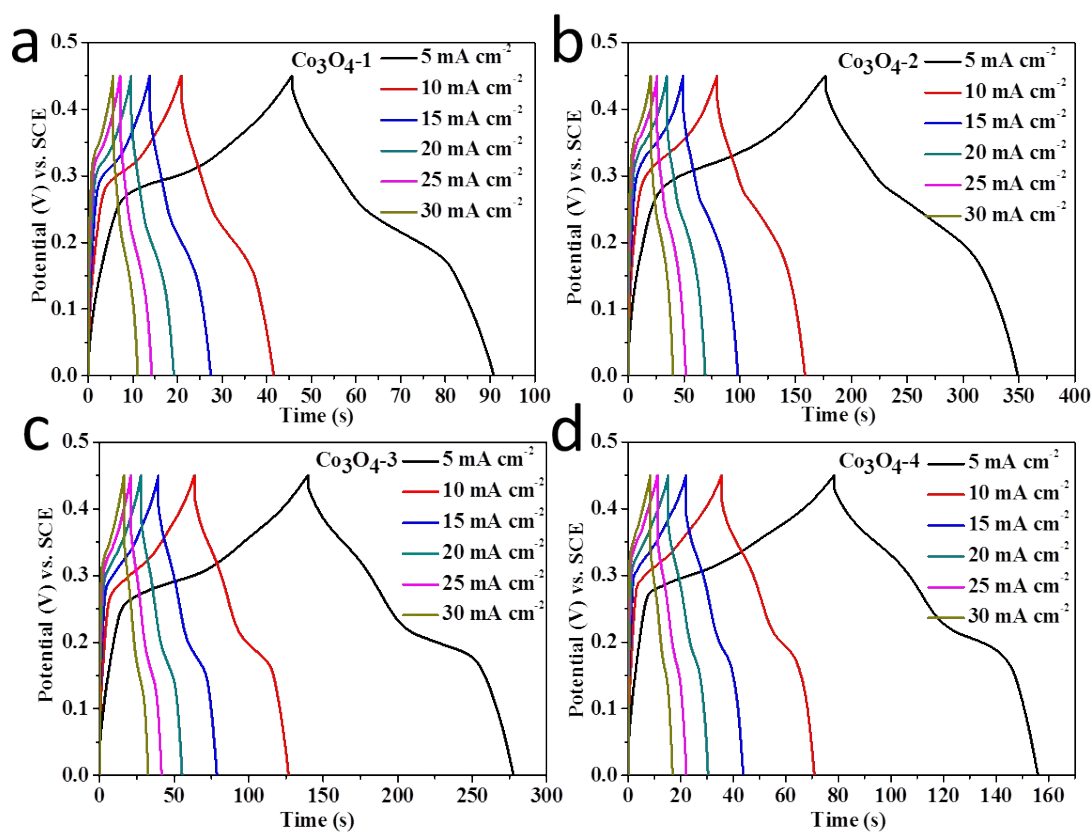

**Figure S9** Charge and discharge curves of  $\text{Co}_3\text{O}_4$ -1 (a),  $\text{Co}_3\text{O}_4$ -2 (b),  $\text{Co}_3\text{O}_4$ -3 (c), and  $\text{Co}_3\text{O}_4$ -4 (d) at various current densities.

**Table S1** Comparison of values for the specific area capacitance in previously reported works on supercapacitors with values for the four  $\text{Co}_3\text{O}_4$  materials presented here.

| Material                                        | Specific area capacitance ( $\text{F cm}^{-2}$ ) | Reference |
|-------------------------------------------------|--------------------------------------------------|-----------|
| $\text{Co}_3\text{O}_4$                         | 0.68 ( $4.2 \text{ mA/cm}^2$ )                   | S1        |
| $\text{Co}_3\text{O}_4@\text{NiO}$              | 1.35 ( $6 \text{ mA/cm}^2$ )                     |           |
| $\text{Co}_3\text{O}_4$                         | 0.135 ( $11.25 \text{ mA/cm}^2$ )                | S2        |
| $\text{Co}_3\text{O}_4@\text{MnO}_2$            | 0.56 ( $11.25 \text{ mA/cm}^2$ )                 |           |
| CoO                                             | 0.285 ( $5 \text{ mA/cm}^2$ )                    | S3        |
| $\text{CoO}@PPy$                                | 2.51 ( $5 \text{ mA/cm}^2$ )                     |           |
| $\text{Co}_3\text{O}_4$                         | 0.79 ( $5 \text{ mV/s}$ )                        | S4        |
| $\text{Co}_3\text{O}_4@\text{NiCo}_2\text{O}_4$ | 2.04 ( $5 \text{ mV/s}$ )                        |           |
| $\text{NiCo}_2\text{O}_4$                       | 0.84 ( $2 \text{ mA/cm}^2$ )                     | S5        |

|                                                                    |                                 |           |
|--------------------------------------------------------------------|---------------------------------|-----------|
| NiCo <sub>2</sub> O <sub>4</sub> @NiCo <sub>2</sub> O <sub>4</sub> | 1.55 (2 mA/cm <sup>2</sup> )    |           |
| MnO <sub>2</sub>                                                   | 0.101 (8.5 mA/cm <sup>2</sup> ) | S6        |
| MnO <sub>2</sub> @NiO                                              | 0.35 (8.5 mA/cm <sup>2</sup> )  |           |
| NiCo <sub>2</sub> O <sub>4</sub>                                   | 1.5 (8.5 mA/cm <sup>2</sup> )   | S7        |
| NiCo <sub>2</sub> O <sub>4</sub> @MnO <sub>2</sub>                 | 2.54(8.5 mA/cm <sup>2</sup> )   |           |
| Co <sub>3</sub> O <sub>4</sub> -1                                  | 0.5 (5 mA/cm <sup>2</sup> )     | This work |
| Co <sub>3</sub> O <sub>4</sub> -2                                  | 1.92 (5 mA/cm <sup>2</sup> )    | This work |
| Co <sub>3</sub> O <sub>4</sub> -3                                  | 1.53 (5 mA/cm <sup>2</sup> )    | This work |
| Co <sub>3</sub> O <sub>4</sub> -4                                  | 0.87 (5 mA/cm <sup>2</sup> )    | This work |

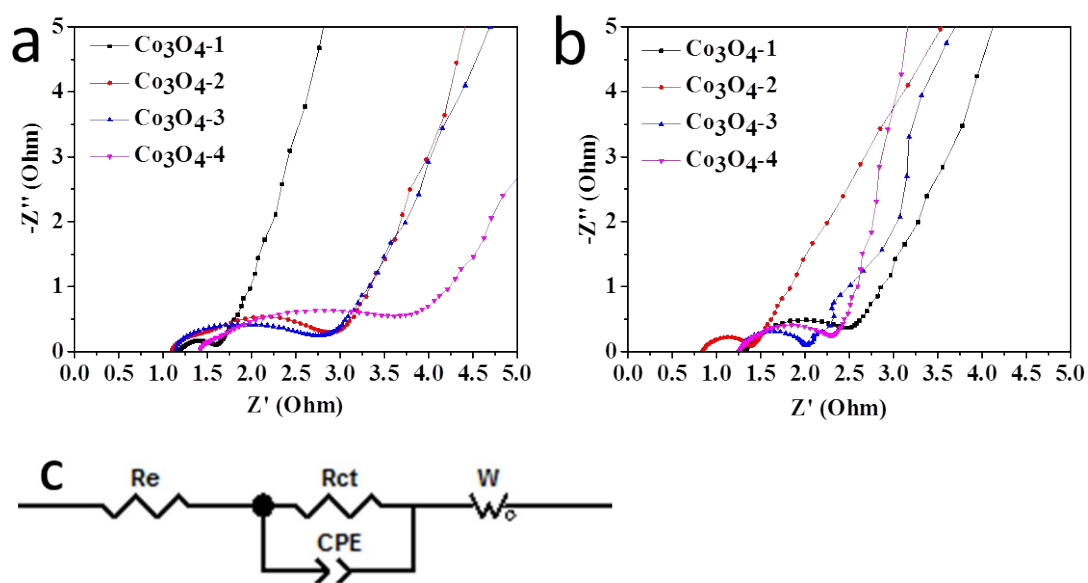

**Figure S10** Electrochemical impedance spectroscopy plots of Co<sub>3</sub>O<sub>4</sub>-1, Co<sub>3</sub>O<sub>4</sub>-2, Co<sub>3</sub>O<sub>4</sub>-3, and Co<sub>3</sub>O<sub>4</sub>-4 before cycling (a), after 3000 cycles (b), and equivalent circuit (c).

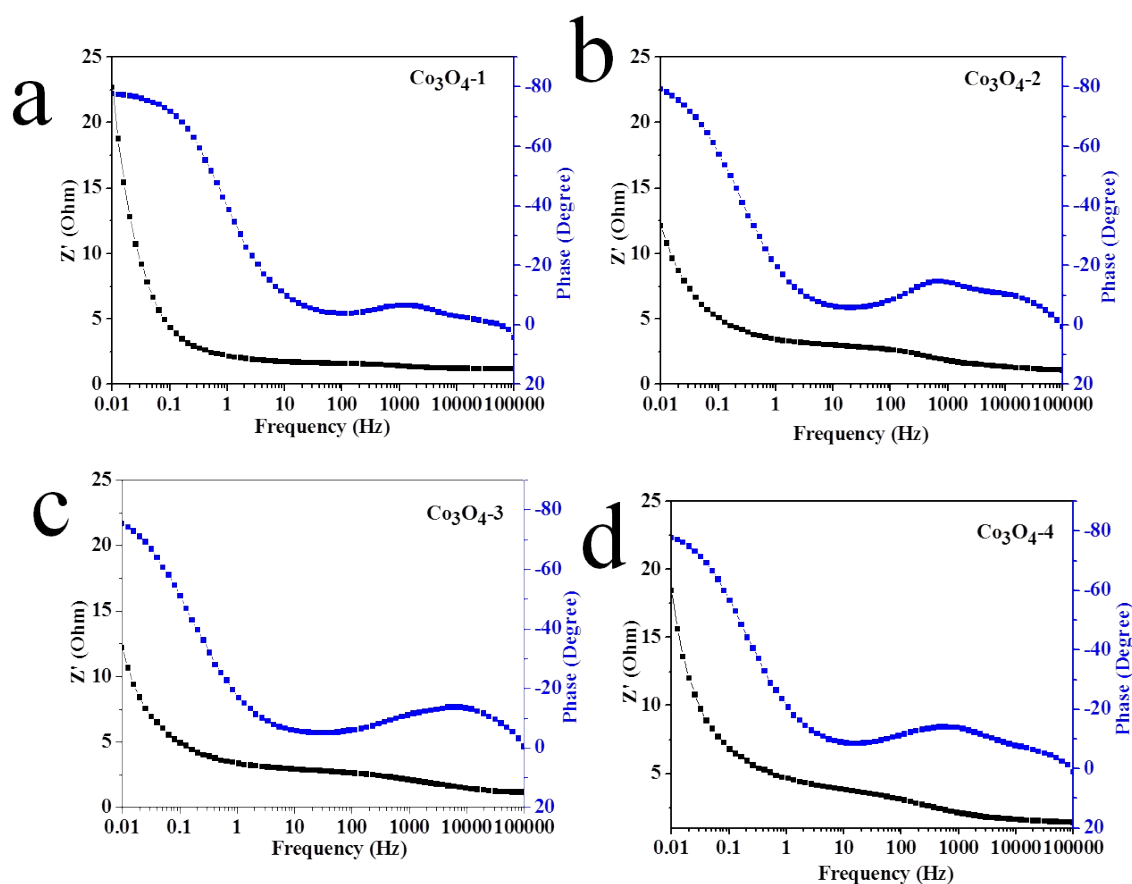

**Figure S11** Bode plots of  $\text{Co}_3\text{O}_4$ -1,  $\text{Co}_3\text{O}_4$ -2,  $\text{Co}_3\text{O}_4$ -3, and  $\text{Co}_3\text{O}_4$ -4.

## References:

- S1 X. Xia, J. Tu, Y. Zhang, X. Wang, C. Gu, X. B. Zhao and H. J. Fan, *ACS Nano*, 2012, 6, 5531-5538.
- S2 J. Liu, J. Jiang, C. Cheng, H. Li, J. Zhang, H. Gong and H. J. Fan, *Adv Mater*, 2011, 23, 2076-2081.
- S3 C. Zhou, Y. Zhang, Y. Li and J. Liu, *Nano Lett*, 2013, 13, 2078-2085.
- S4 G. Zhang, T. Wang, X. Yu, H. Zhang, H. Duan and B. Lu, *Nano Energy*, 2013, 2, 586-594.
- S5 X. Liu, S. Shi, Q. Xiong, L. Li, Y. Zhang, H. Tang, C. Gu, X. Wang and J. Tu, *ACS Appl Mater Interfaces*, 2013, 5, 8790-8795.
- S6 J. Liu, J. Jiang, M. Bosman and H. J. Fan, *J Mater Chem*, 2012, 22, 2419-2426.
- S7 L. Yu, G. Zhang, C. Yuan and X. W. Lou, *Chem Commun*, 2013, 49, 137-139.
